# Supplementary material for: Racial/Ethnic and Socioeconomic Disparities in Management of Incident Paroxysmal Atrial Fibrillation
Source: PubMed Central journal article supplement (PMC7910819; doi:10.1001/jamanetworkopen.2021.0247), 2021-02-26

## Supplementary Online Content

Eberly LA, Garg L, Yang L, et al. Racial/ethnic and socioeconomic disparities in management of incident paroxysmal atrial fibrillation. *JAMA Netw Open*. 2021;4(2):e210247. doi:10.1001/jamanetworkopen.2021.0247

**eFigure.** Cumulative Rates of Treatment with AADs and Catheter Ablation for Paroxysmal Atrial Fibrillation Among Patients with HFrEF (A) and Cumulative Rates of Treatment with Catheter Ablation for Paroxysmal Atrial Fibrillation by Race/Ethnicity Among Patients with HFrEF (B)

This supplementary material has been provided by the authors to give readers additional information about their work.

eFigure. Cumulative Rates of Treatment with AADs and Catheter Ablation for Paroxysmal Atrial Fibrillation Among Patients with HFrEF (A) and Cumulative Rates of Treatment with Catheter Ablation for Paroxysmal Atrial Fibrillation by Race/Ethnicity Among Patients with HFrEF (B)

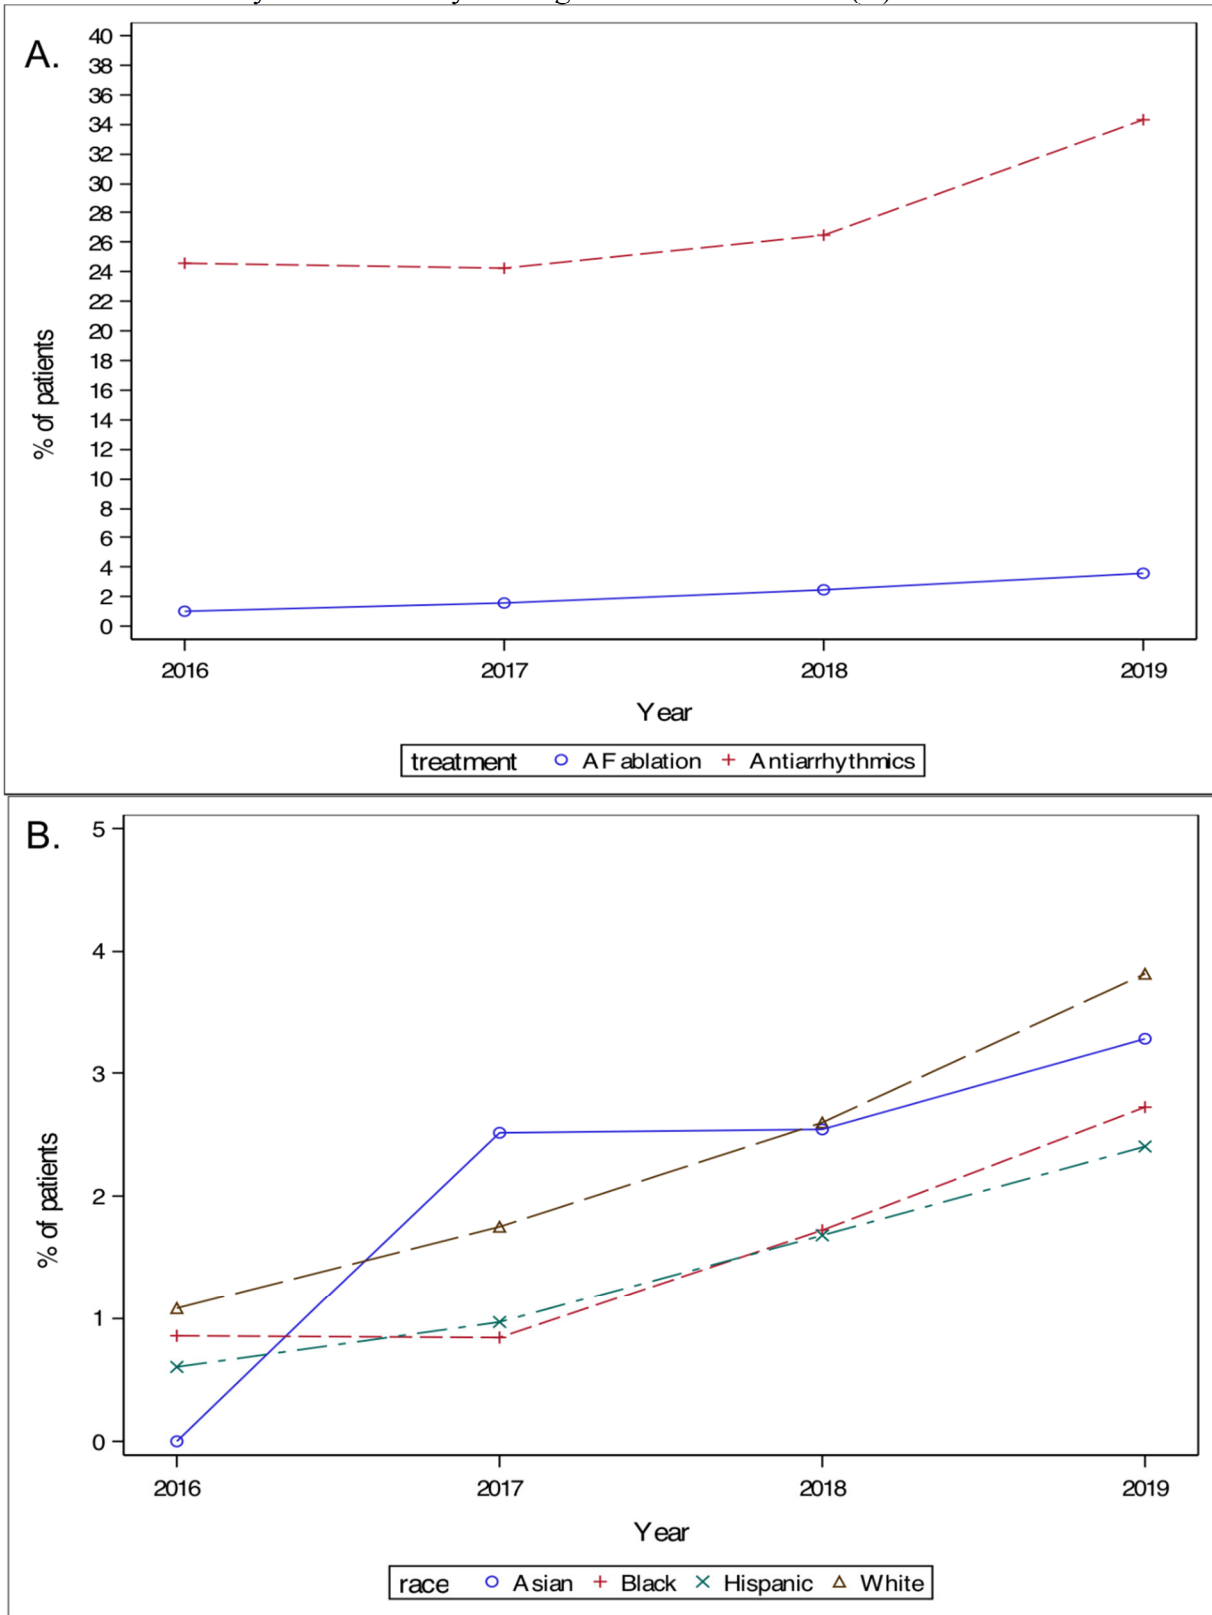

Supplement: jamanetwopen-e210247-s001.pdf [file jamanetwopen-e210247-s001.pdf]
